# Supplementary material
Source: PubMed Central journal article supplement (PMC5331759)

Figure 3J

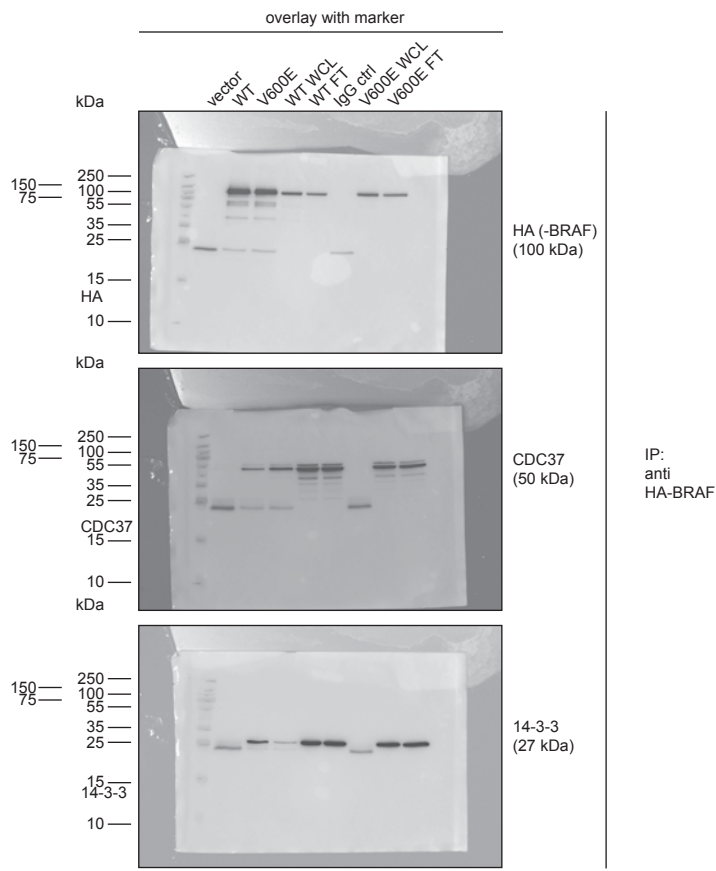

IP anti HA: three individual membranes were incubated with the respective antibody

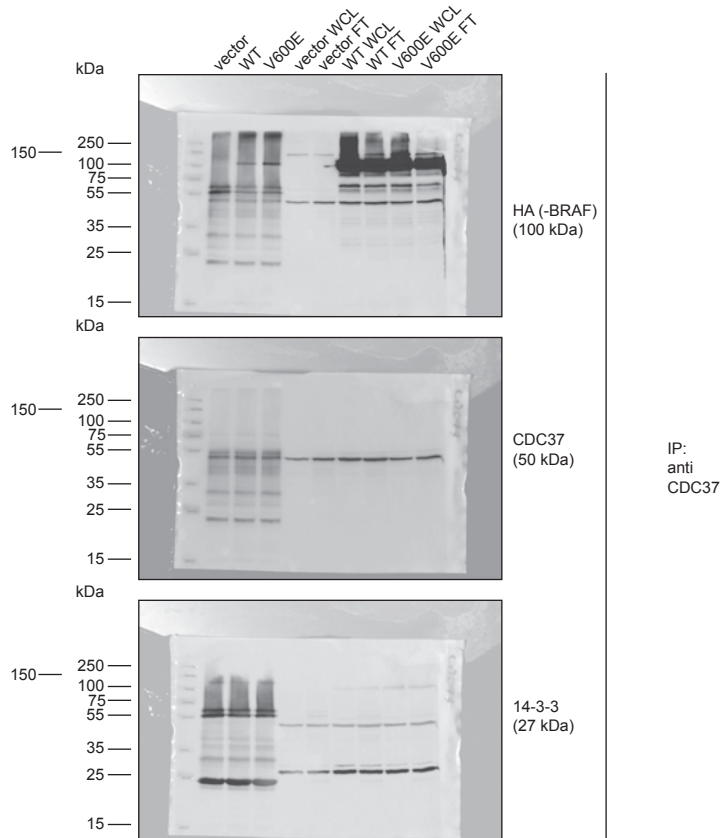

IP anti CDC37: one and the same membrane was incubated with the respective antibody. 1. anti CDC37; 2. anti 14-3-3; 3. anti HA

Figure 3K

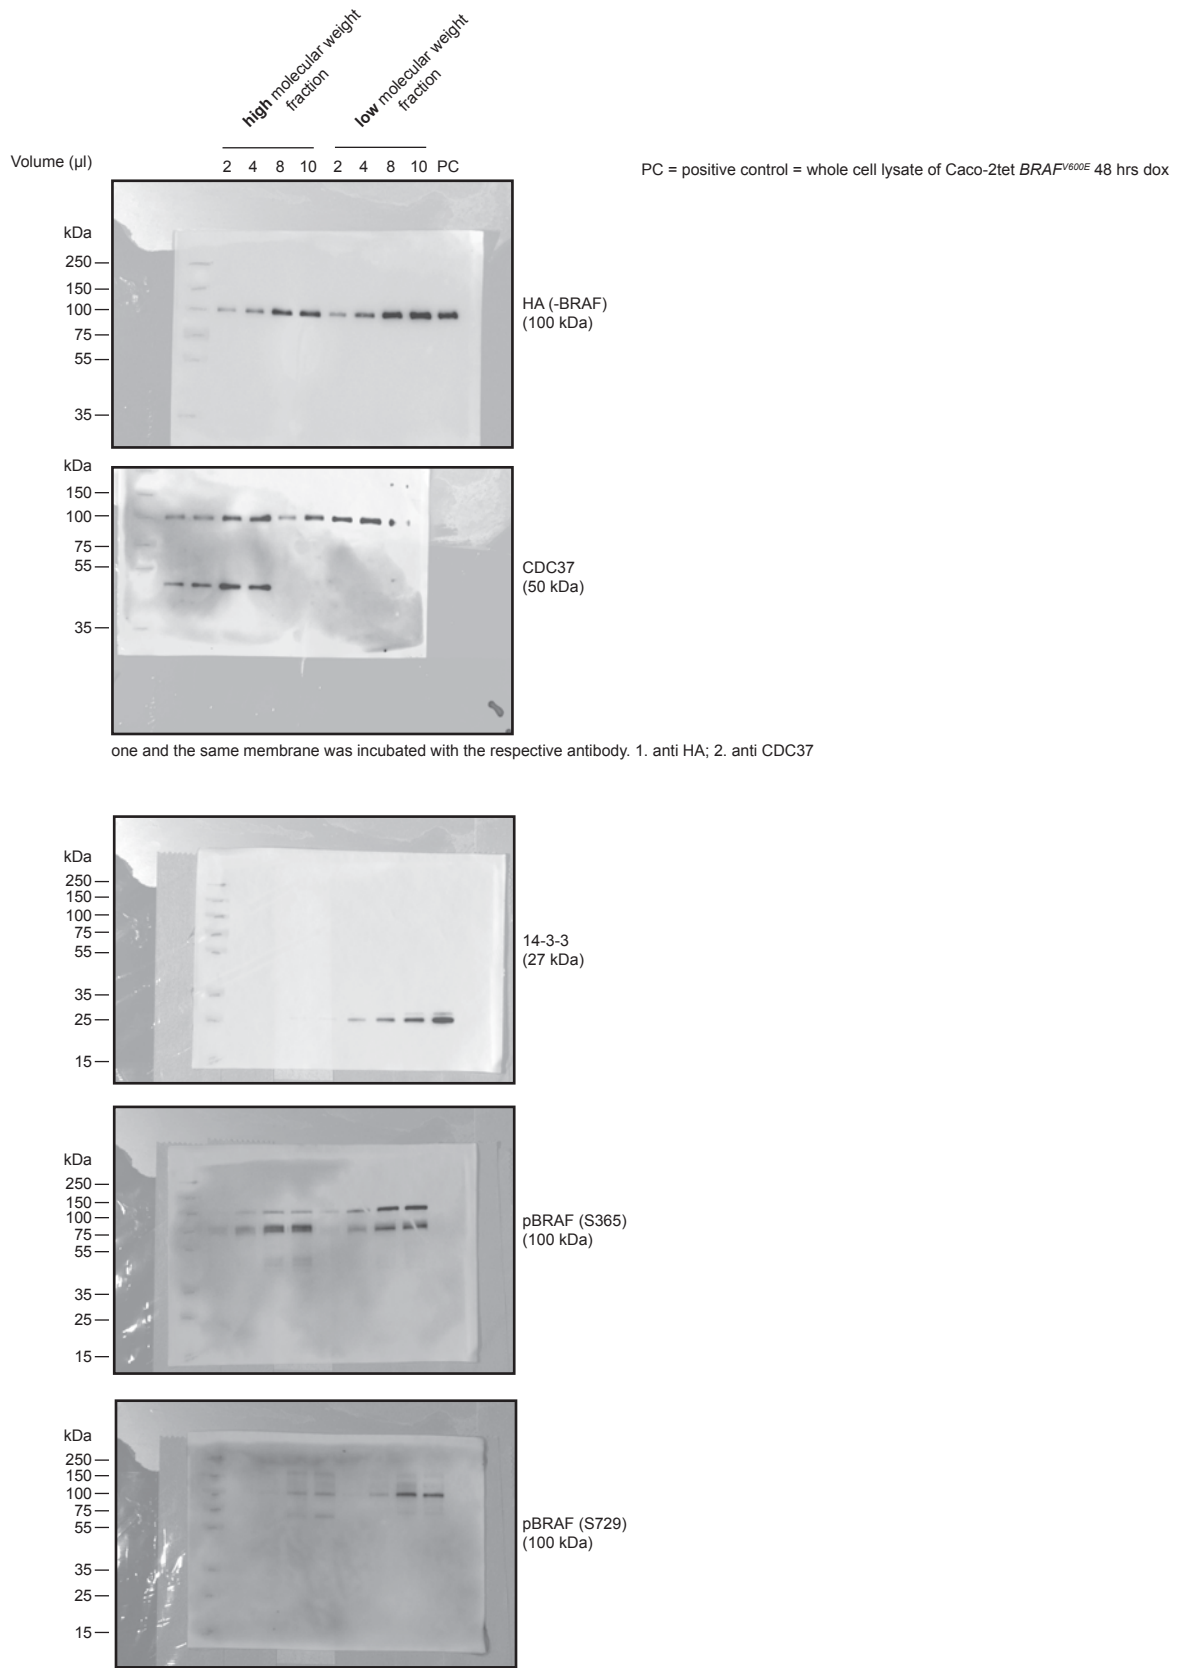

Figure 3M

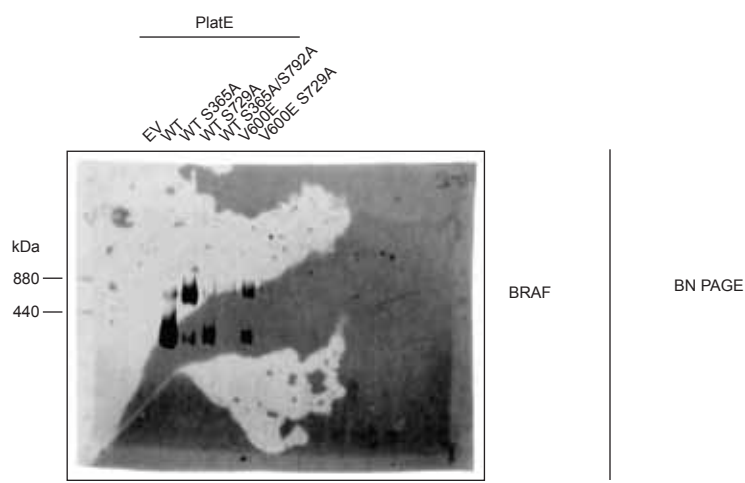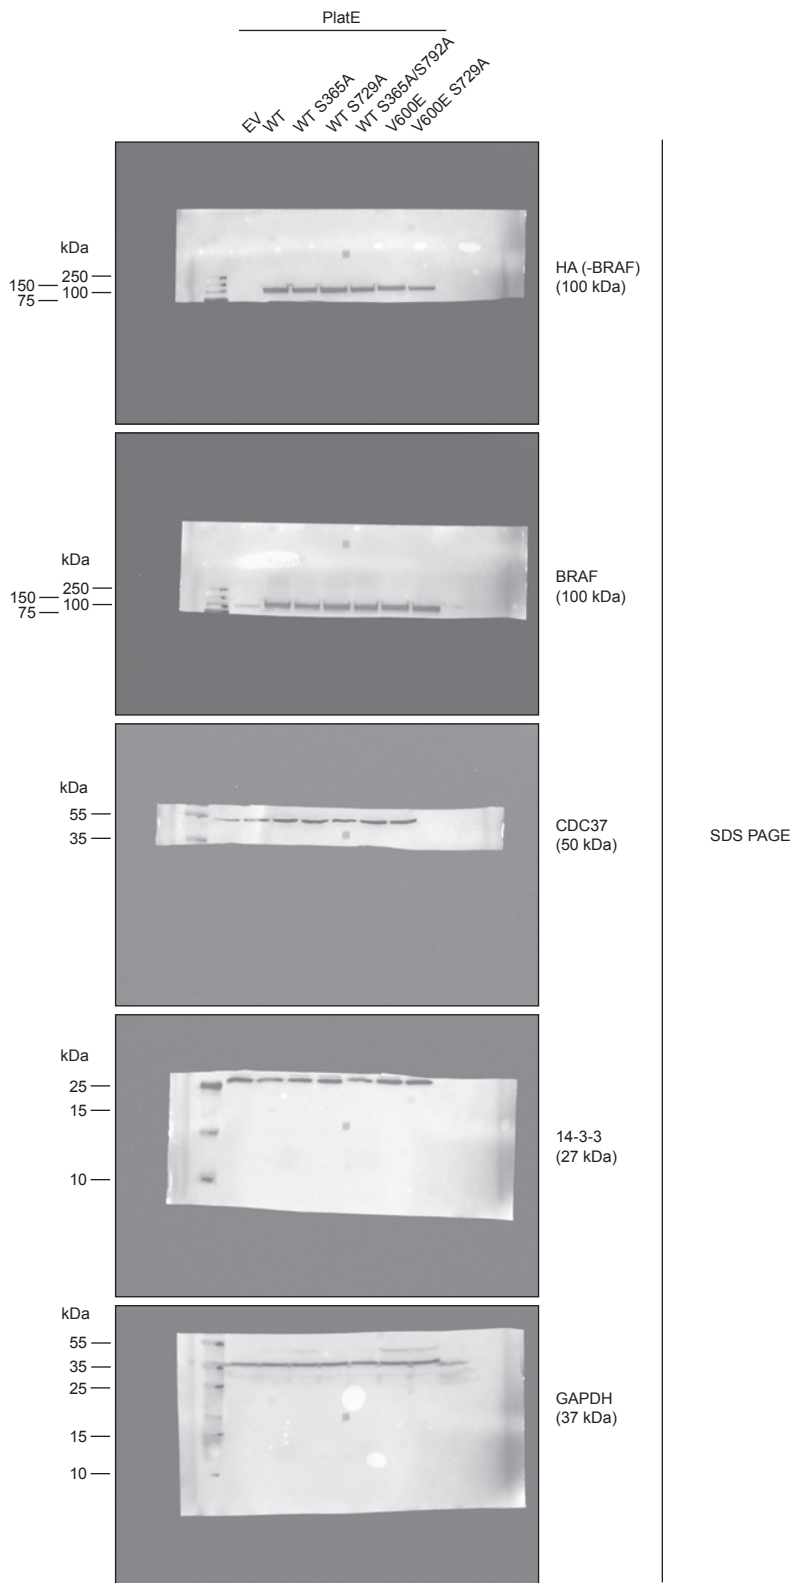

Supplement: EMBJ-36-646-s006.pdf [file EMBJ-36-646-s006.pdf]
