# Supplementary material
Source: PubMed Central journal article supplement (PMC5331759)

Figure 6A

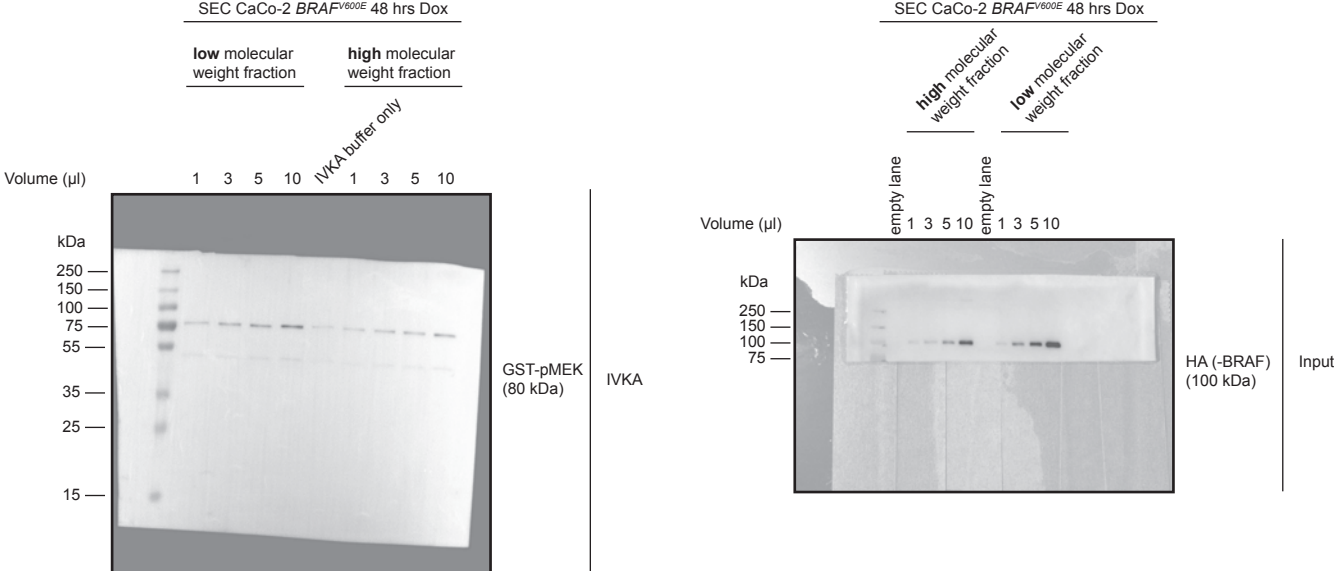

Figure 6B

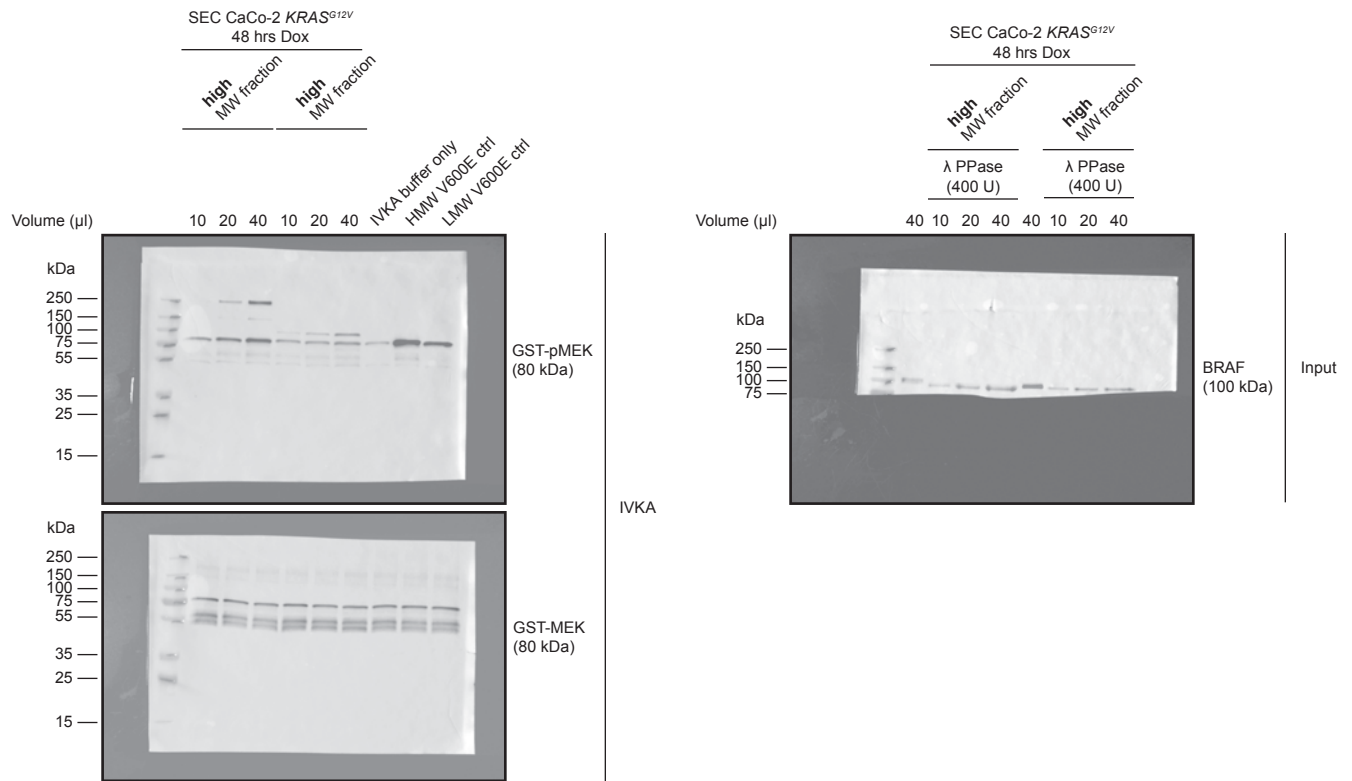

Figure 6C:

From left to right, lane by lane:

1. Marker, top mark = 880 kDa, lower mark = 440 kDa
2. Empty lane
3. CaCo-2 vector cells, no dox induction, DMSO ctrl
4. CaCo-2 vector cells, dox induction, DMSO ctrl
5. CaCo-2 *KRAS*<sup>G12V</sup> cells, no dox induction, DMSO ctrl
6. CaCo-2 *KRAS*<sup>G12V</sup> cells, dox induction, DMSO ctrl
7. CaCo-2 *KRAS*<sup>G12V</sup> cells, dox induction, Vemurafenib
8. CaCo-2 *KRAS*<sup>G12V</sup> cells, dox induction, Sorafenib

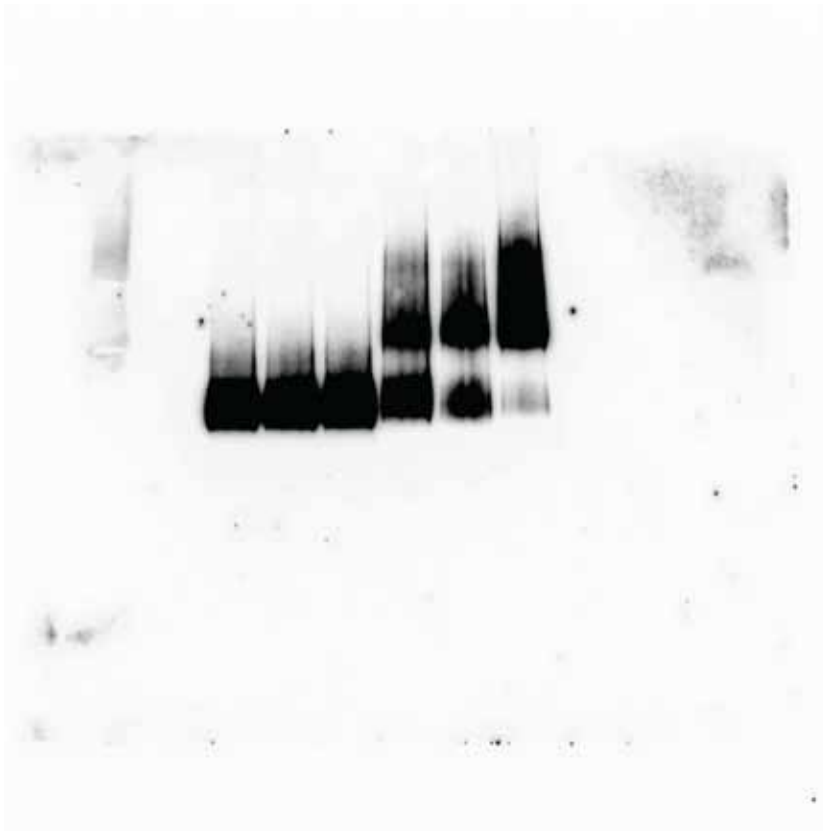

Figure 6D

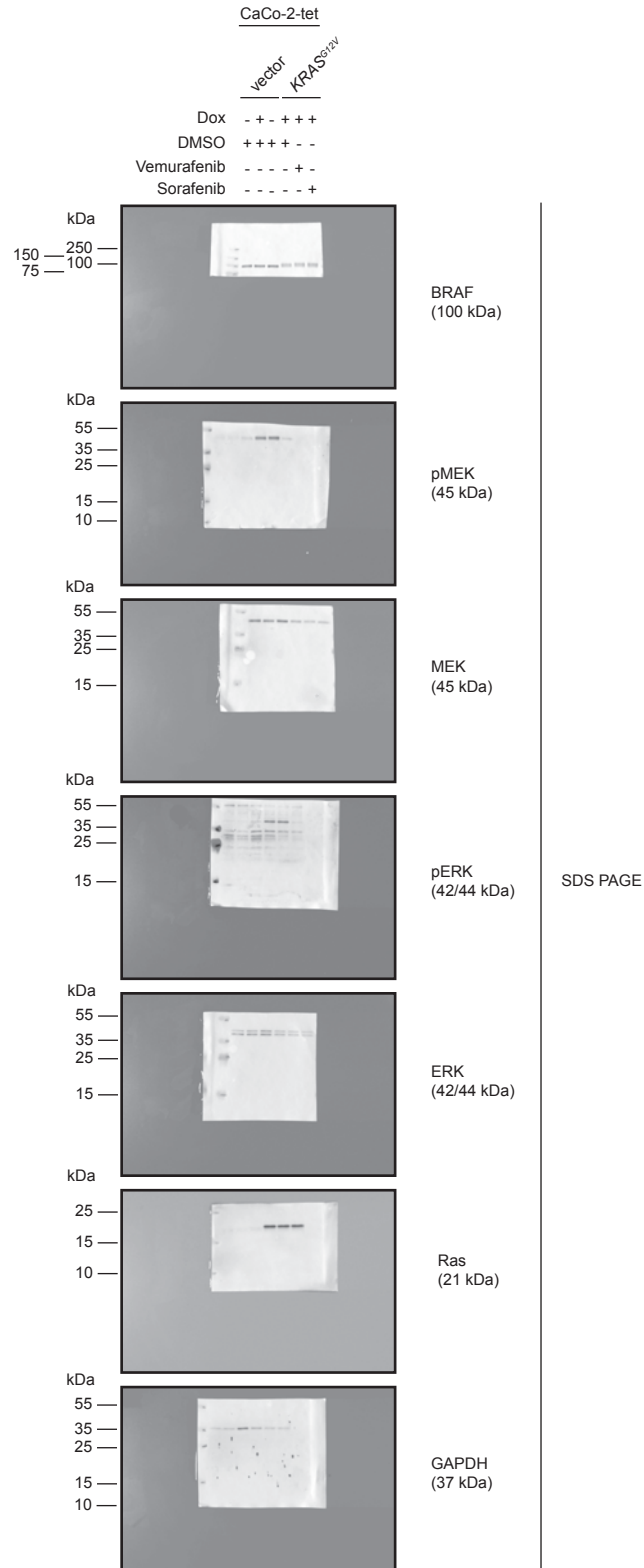

Figure 6E

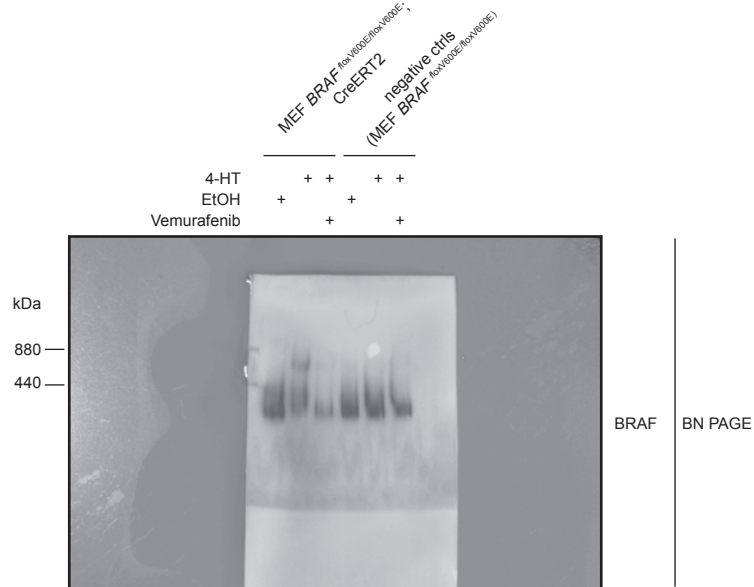

Figure 6F

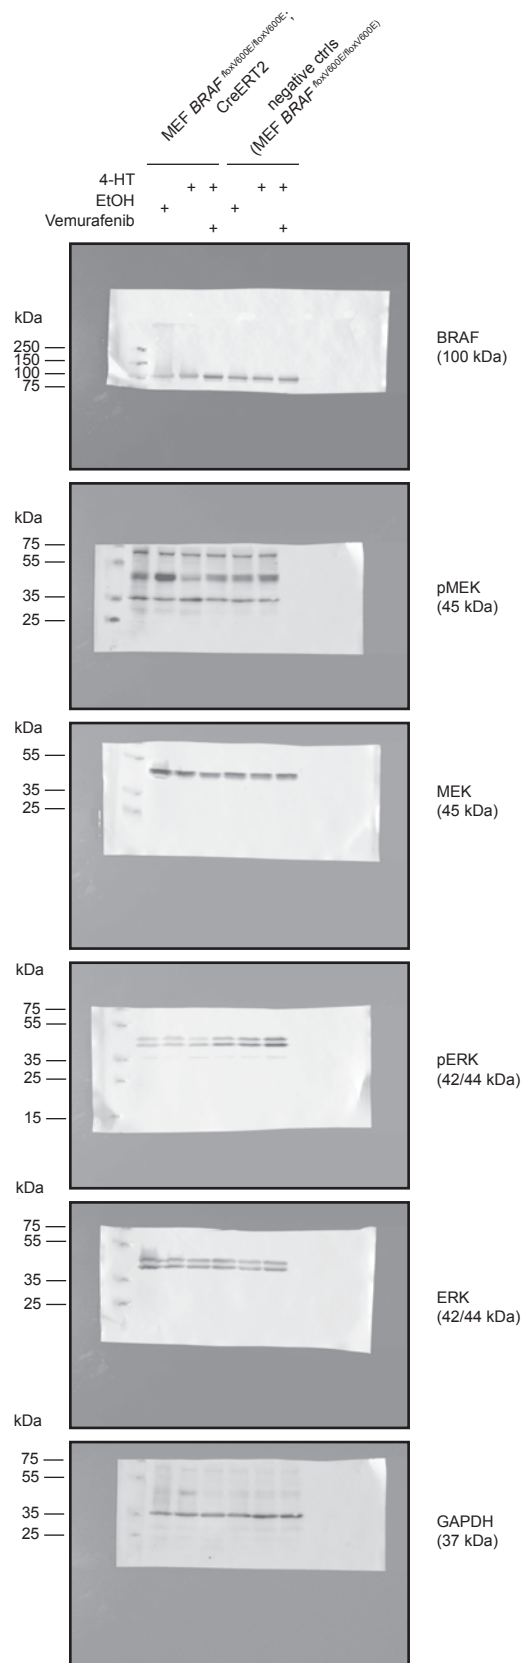

SDS PAGE

Figure 6G:

From left to right, lane by lane:

- 1. Marker
- 2. No treatment
- 3. DMSO ctrl
- 4. Vemurafenib
- 5. Sorafenib
- 6. No treatment
- 7. DMSO ctrl
- 8. Vemurafenib
- 9. Sorafenib
- 10. No treatment
- 11. DMSO ctrl
- 12. Vemurafenib
- 13. Sorafenib
- 14. Empty lane
- 15. Marker

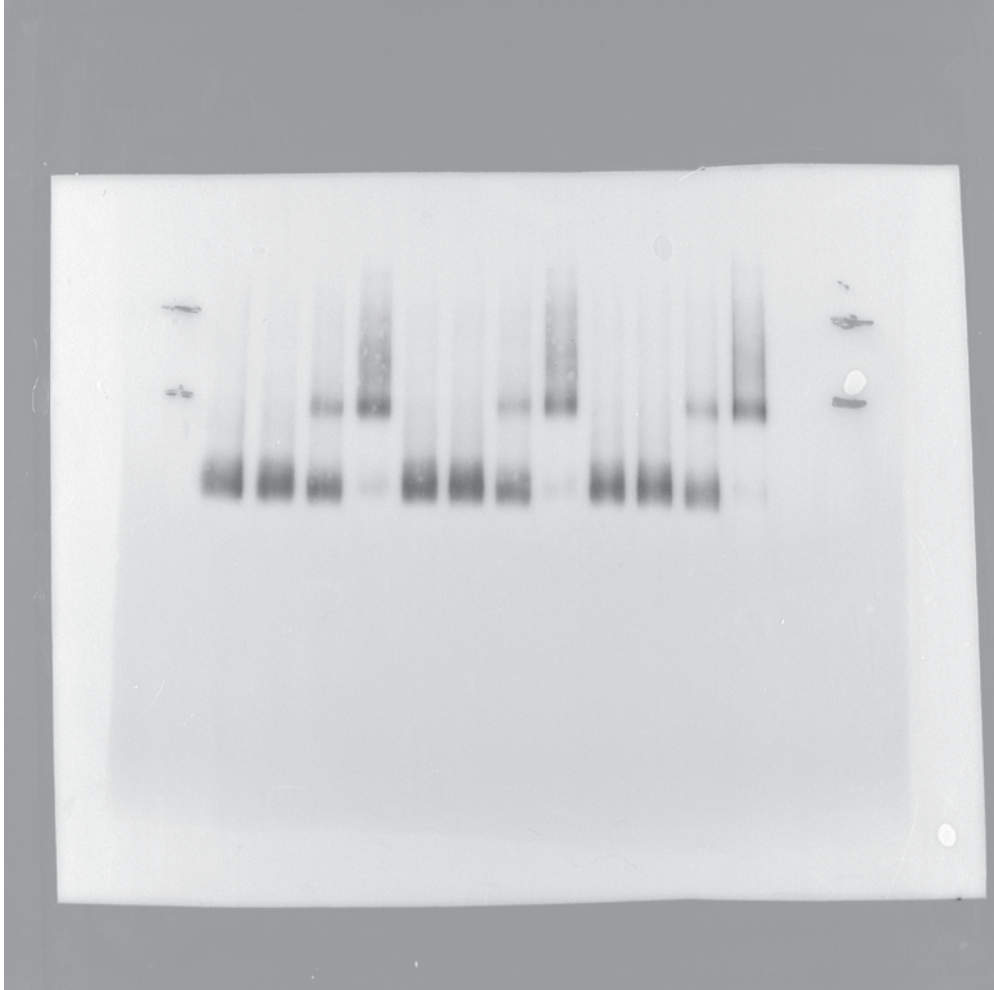

Figure 6H

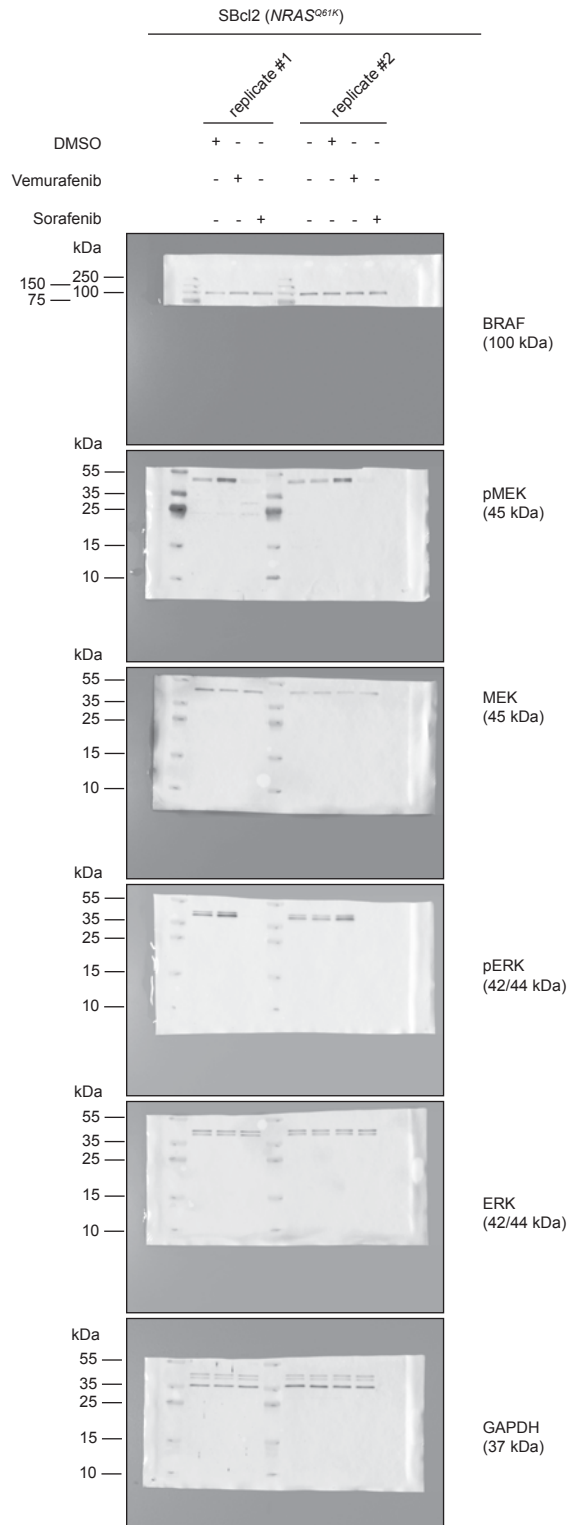

Supplement: EMBJ-36-646-s009.pdf [file EMBJ-36-646-s009.pdf]
