# Supplementary material
Source: PubMed Central journal article supplement (PMC5331759)

Figure 1A

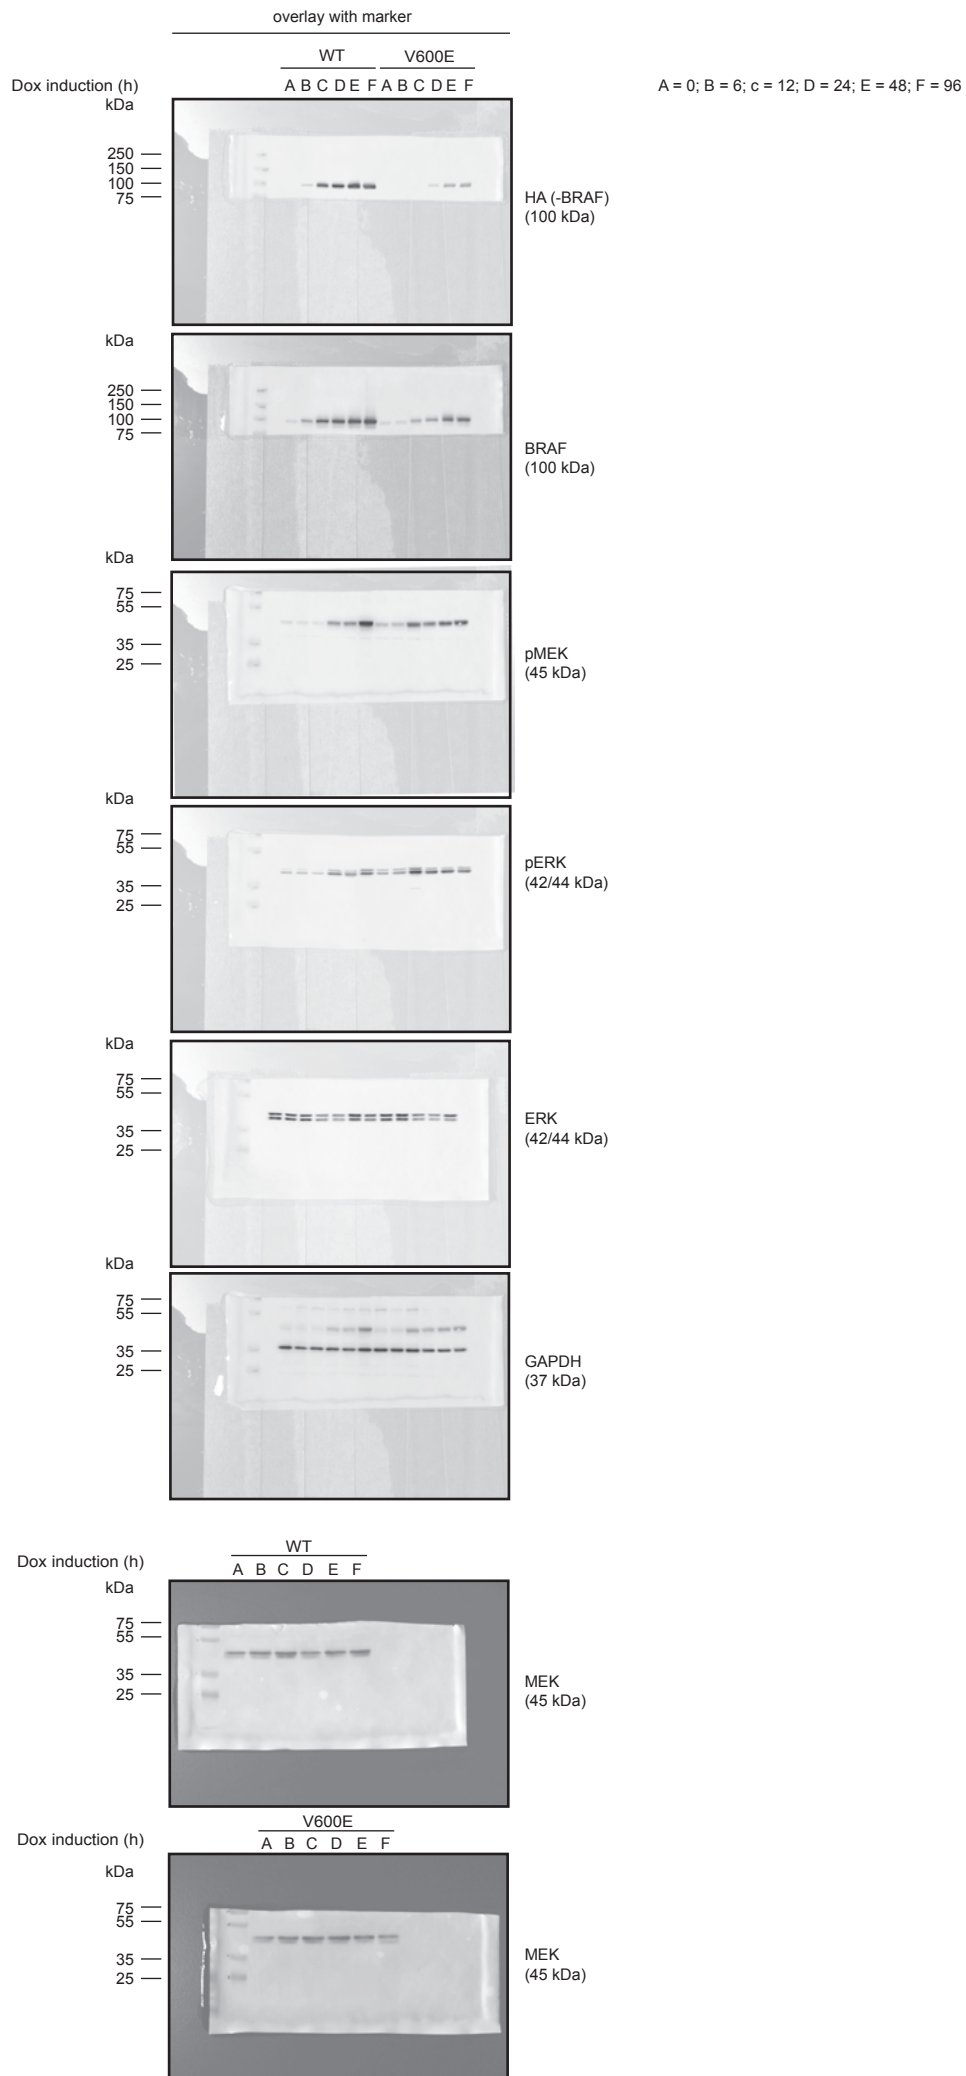

Supplement: EMBJ-36-646-s005.pdf [file EMBJ-36-646-s005.pdf]

Figure 4I

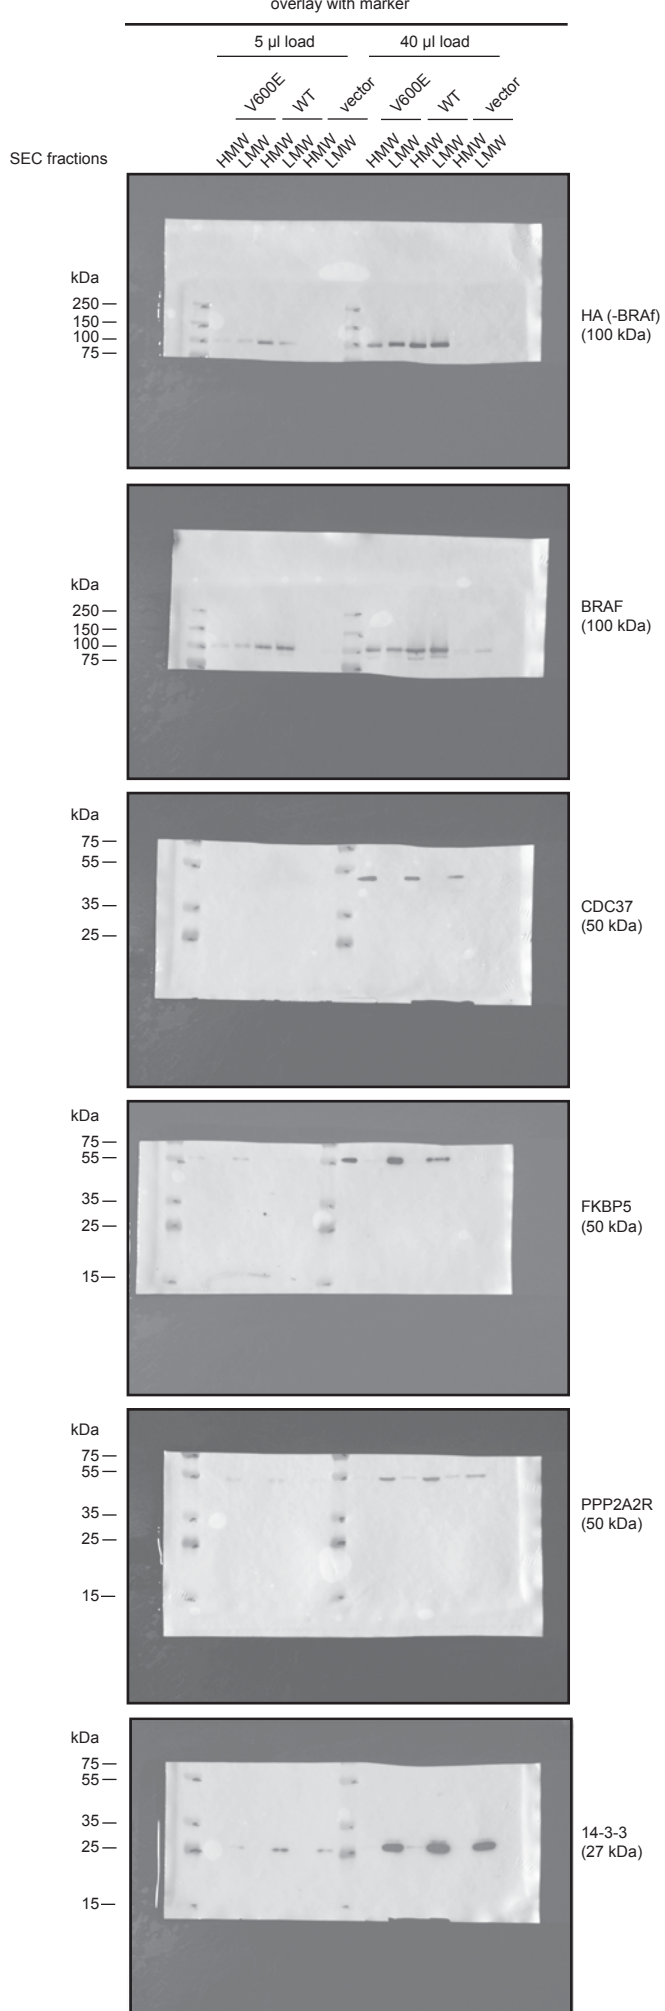

Supplement: EMBJ-36-646-s007.pdf [file EMBJ-36-646-s007.pdf]

Figure 5A

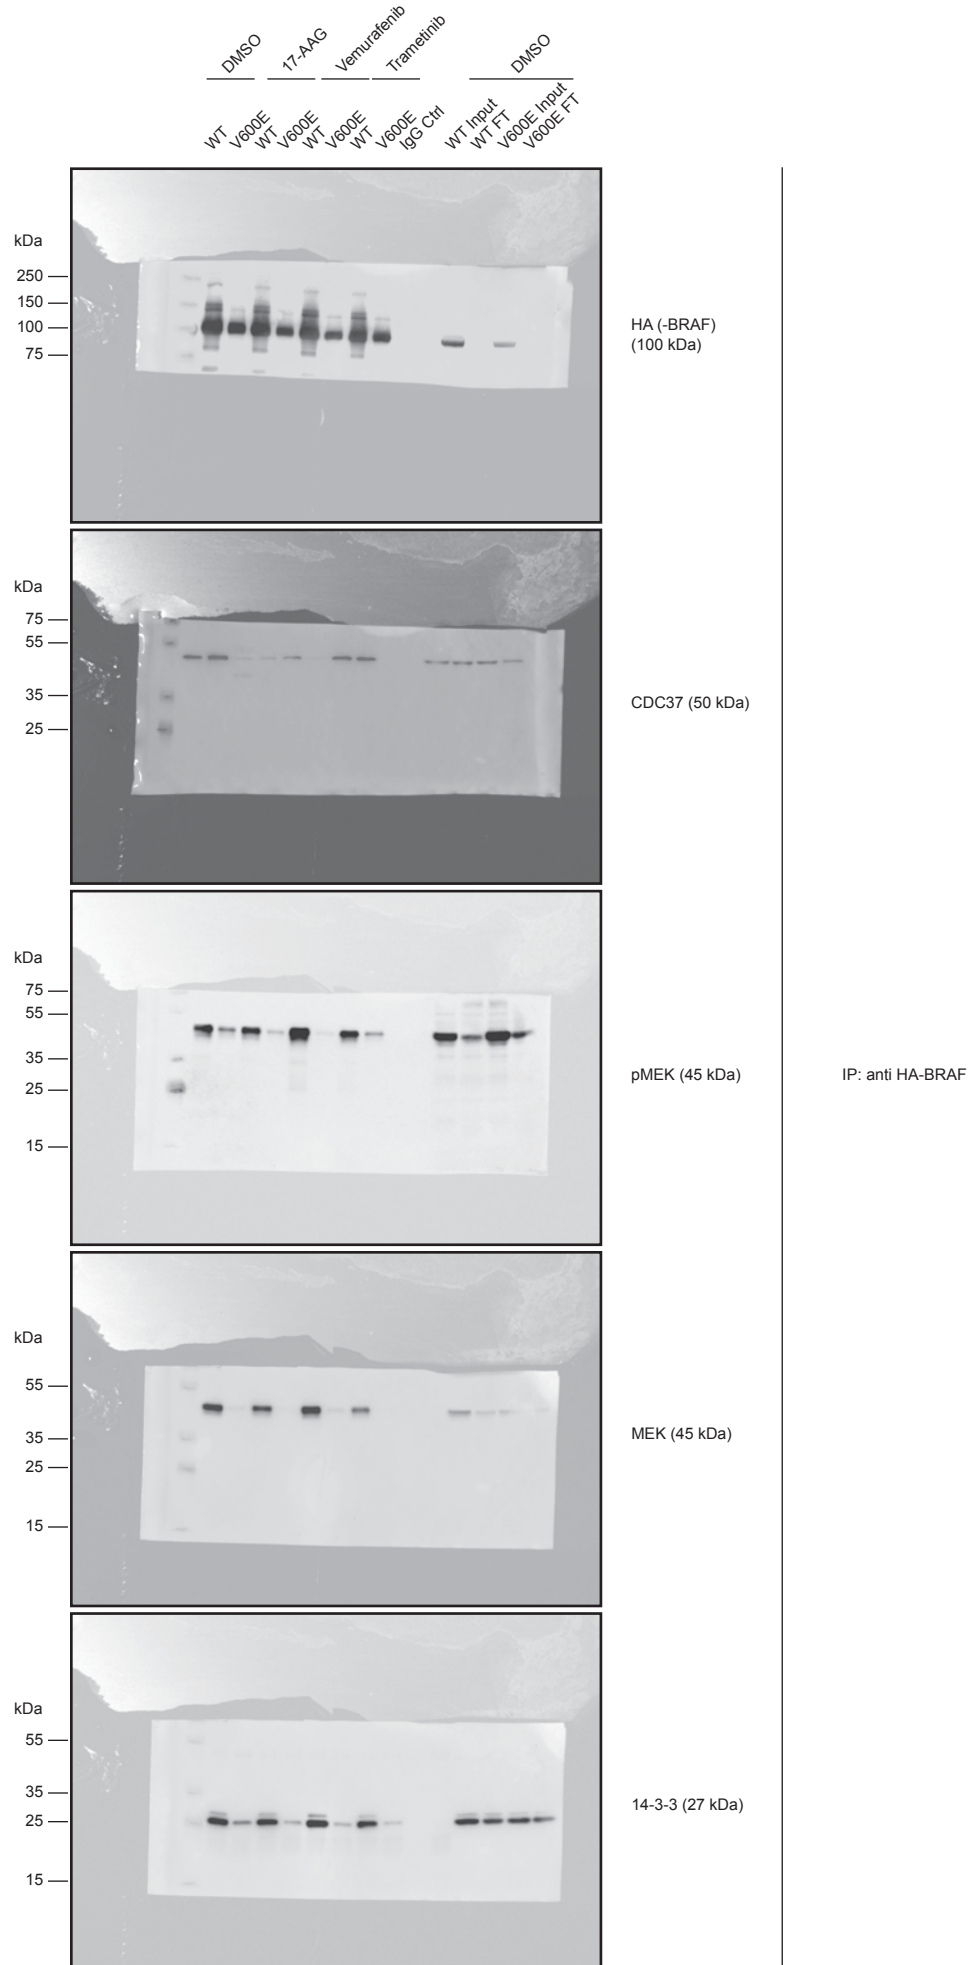

Figure 5C

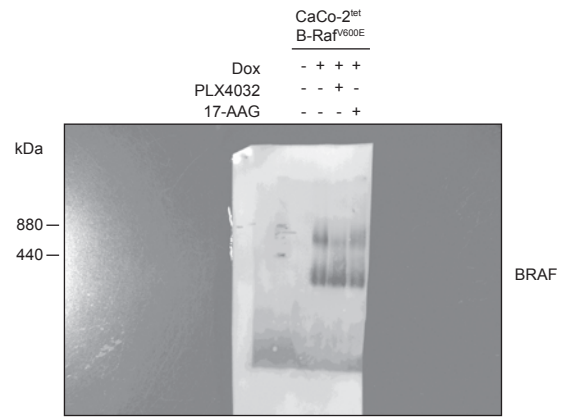

Figure 5D

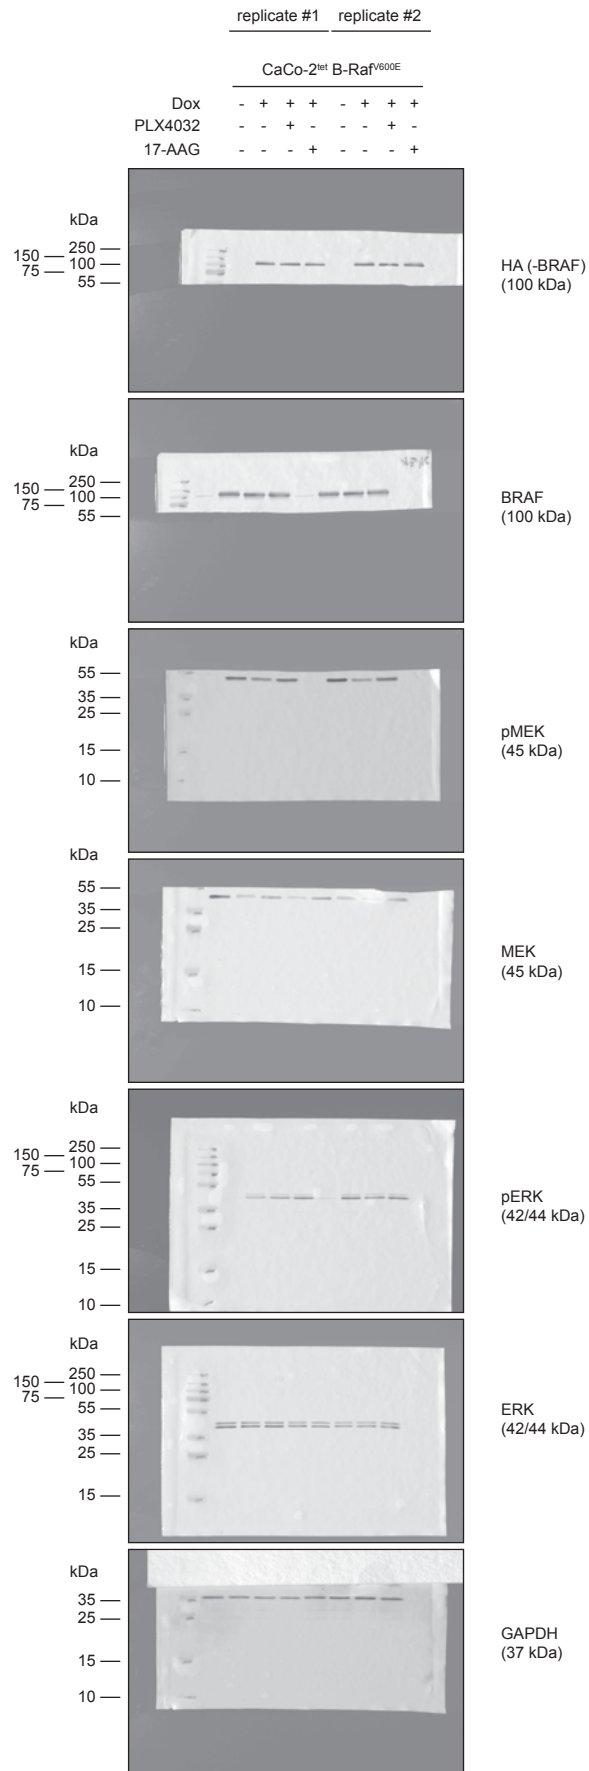

Supplement: EMBJ-36-646-s008.pdf [file EMBJ-36-646-s008.pdf]
